# Supplementary material for: Coating of Pd/C catalysts with Lewis-acidic ionic liquids and liquid coordination complexes – SCILL induced activity enhancement in arene hydrogenation
Source: Royal Society of Chemistry journal article supplement (doi:10.1039/c7ra03295a), 2017-01-01
Supplement: c7ra03295a1.pdf [file c7ra03295a1.pdf]

## Supporting information

### **Coating of Pd/C catalysts with Lewis-acidic ionic liquids and liquid coordination complexes – SCILL induced activity enhancement in arene hydrogenation**

Martin Lijewski <sup>1</sup>, James M. Hogg <sup>2</sup>, Małgorzata Swadźba-Kwaśny <sup>2\*</sup>, Peter Wasserscheid <sup>1</sup>,  
Marco Haumann <sup>1\*</sup>

1 Friedrich-Alexander-Universität Erlangen-Nürnberg (FAU), Lehrstuhl für Chemische Reaktionstechnik (CRT), Egerlandstr. 3, 91058 Erlangen, Germany

2 Queen's University Belfast, School of Chemistry and Chemical Engineering, David Keir Building, Stranmillis Road, Belfast, BT9 5AG, Northern Ireland, UK

## Batch autoclave setup

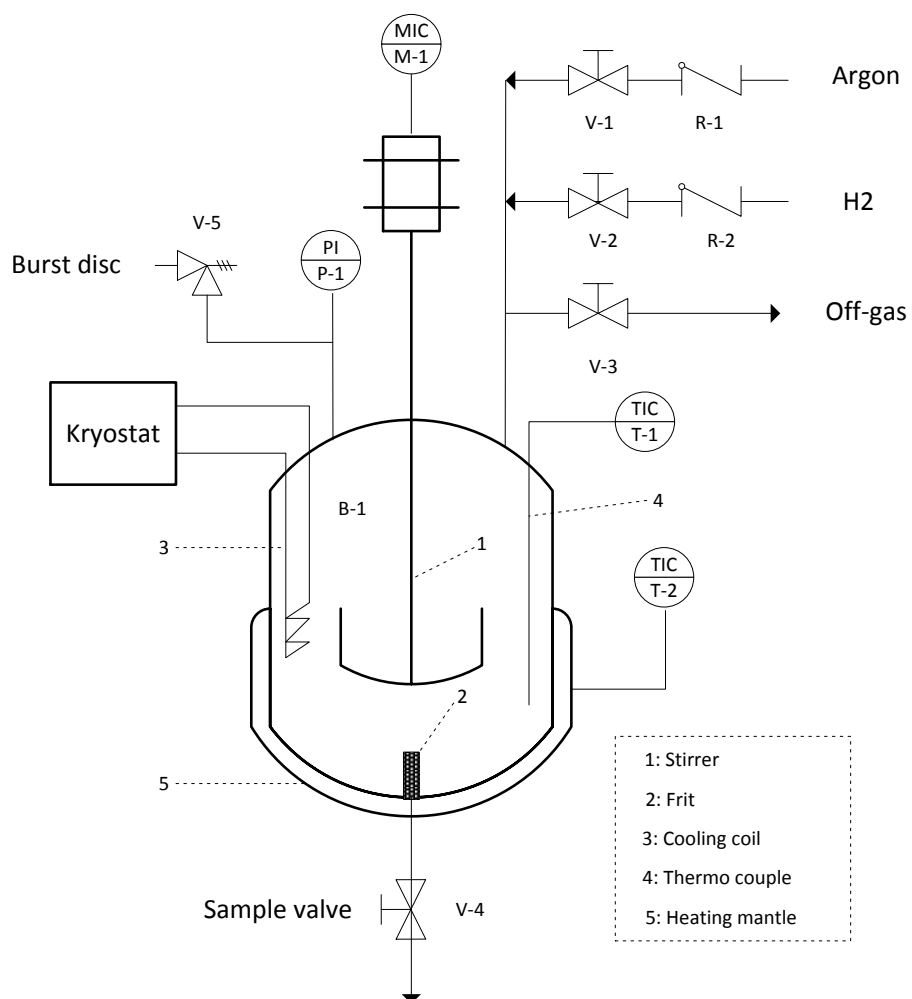

Figure S1. Schematic flow sheet (left) and photograph (right) of the batch reactor utilized.

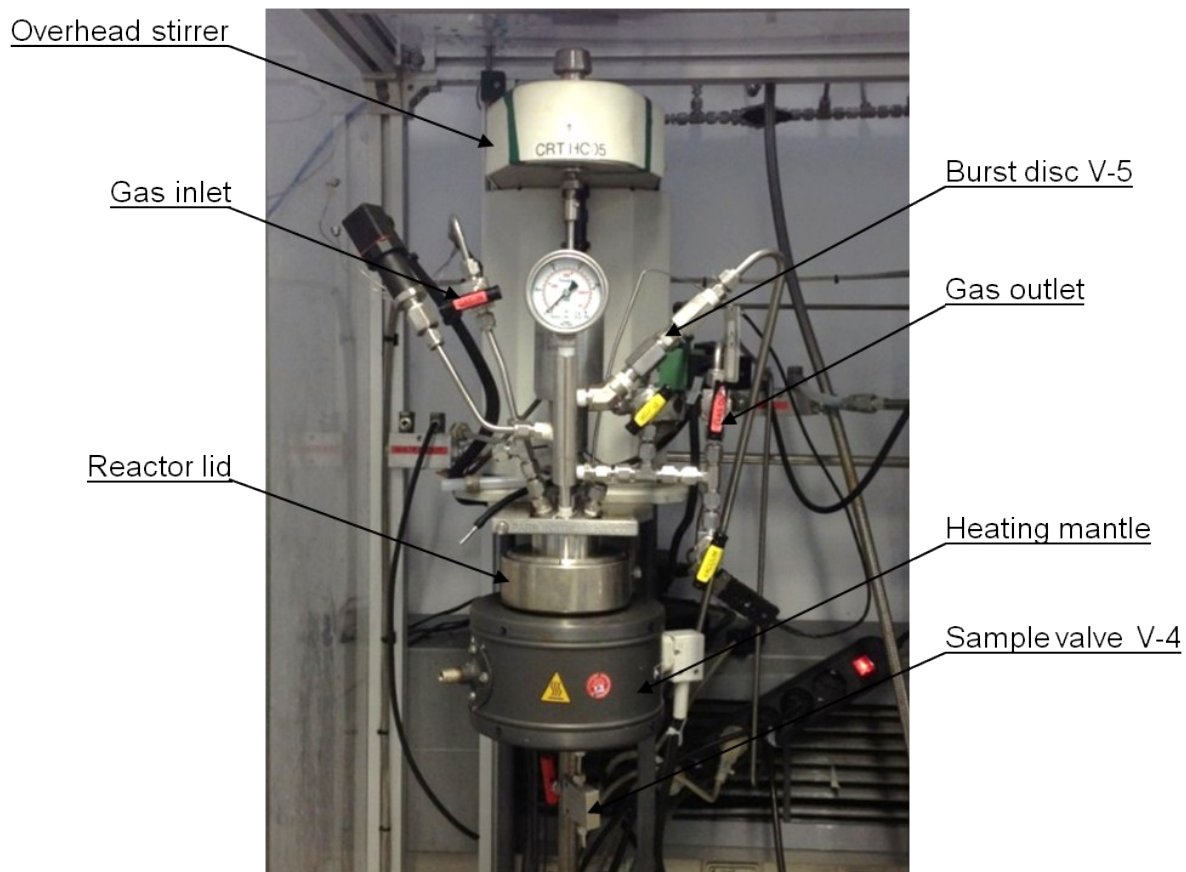

Figure S2. Photograph of the assembled reactor.

## Comparison between addition of AlCl<sub>3</sub> and [BMIM]Cl/AlCl<sub>3</sub> in bulk and SCILL

Figure S3 shows the conversion time plots for uncoated Pd/C without and with addition of [BMIM]Cl/AlCl<sub>3</sub> ( $x_{\text{AlCl}_3} = 0.67$ ). The amount of ionic liquid added was adjusted to the same amount of AlCl<sub>3</sub> present in a Pd-SCILL-1 system, namely approx. 13 % or 41.3 mg.

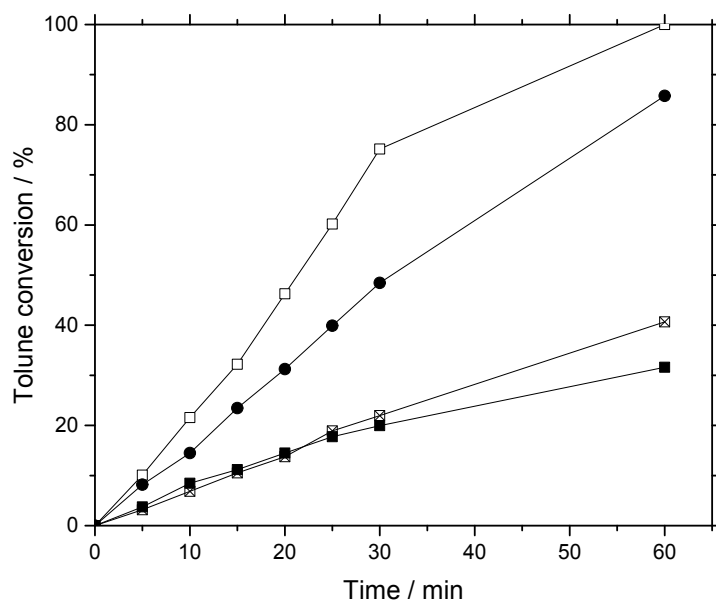

Figure S3. Conversion over time for toluene hydrogenation using Pd/C, with 330 mg (open squares), 41.3 mg (open squares intersected) and without (filled squares) addition of AlCl<sub>3</sub>, as well as Lewis-acidic chloroaluminate Pd-SCILL-1 catalysts (filled circles). Reaction conditions: T = 60 °C,  $p_{\text{hydrogen}} = 15$  bar,  $c_{\text{toluene}} = 0.25$  mol L<sup>-1</sup>, solvent = 100 mL cyclohexane,  $m_{\text{cat}} = 1$  g,  $w_{\text{Pd}} = 10$  wt%, stirring speed = 1000 min<sup>-1</sup>. Ionic liquid = [BMIM]Cl/AlCl<sub>3</sub> ( $x_{\text{AlCl}_3} = 0.67$ ).

### Textural analysis of the Pd-SCILL-1 catalyst

The Pd-SCILL-1 catalyst, coated with chloroaluminate ionic liquid, was analyzed by means of N<sub>2</sub> sorption at 77 K on a Quadrasorb-SI from Quantachrome. The data are compiled in Table S1.

Table S1. Textural data for the Pd-SCILL-1 catalyst containing varying amounts of chloroaluminate ionic liquid [BMIM]Cl/AlCl<sub>3</sub> ( $x_{\text{AlCl}_3} = 0.67$ ).

| Catalyst   | Ionic liquid wt% | Surface area m <sup>2</sup> g <sup>-1</sup> | Pore volume mL g <sup>-1</sup> | Av. Pore diameter nm |
|------------|------------------|---------------------------------------------|--------------------------------|----------------------|
| Pd/C       | -                | 921                                         | 0.67                           | 2.9                  |
| Pd-SCILL-1 | 6                | 393                                         | 0.47                           | 4.8                  |
| Pd-SCILL-1 | 17               | 283                                         | 0.31                           | 4.4                  |
| Pd-SCILL-1 | 45               | 146                                         | 0.18                           | 4.8                  |

## Temperature variation in toluene hydrogenation

The uncoated Pd/C catalyst was tested in the temperature range between 40 and 80 °C.

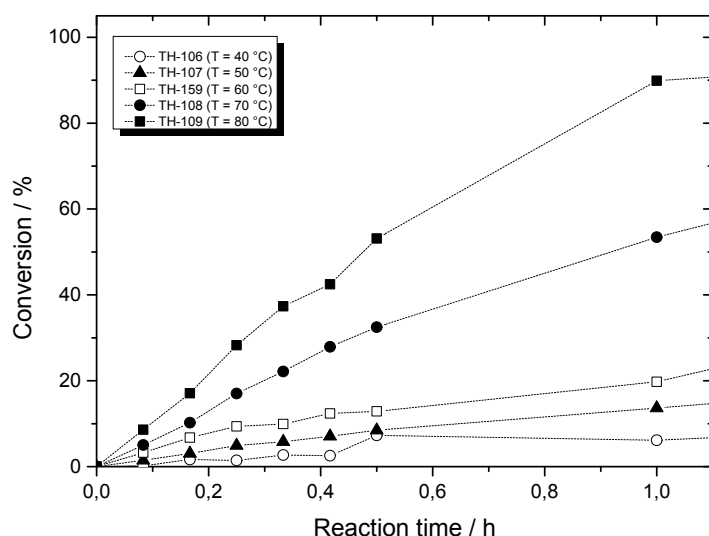

Figure S4. Conversion over time plot for the hydrogenation of toluene using Pd/C catalyst. Reaction conditions:  $p_{\text{hydrogen}} = 15 \text{ bar}$ ,  $c_{\text{toluene}} = 0.25 \text{ mol L}^{-1}$ , solvent = 100 mL cyclohexane,  $m_{\text{cat}} = 1 \text{ g}$ ,  $w_{\text{Pd}} = 10 \text{ wt\%}$ , stirring speed =  $1000 \text{ min}^{-1}$ , ionic liquid coating = 13 wt%.

The chloroaluminate coated Pd-SCILL-1 catalyst was tested in the temperature range between 40 and 80 °C.

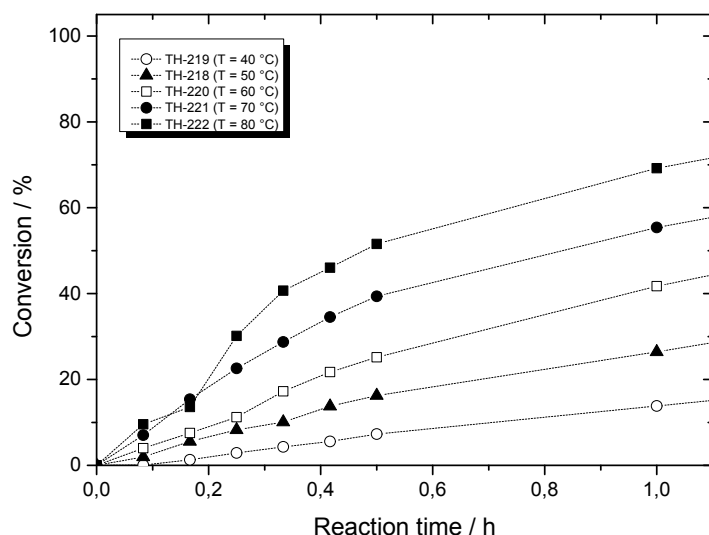

Figure S5. Conversion over time plot for the hydrogenation of toluene using Pd-SCILL-1 catalyst. Reaction conditions:  $p_{\text{hydrogen}} = 15 \text{ bar}$ ,  $c_{\text{toluene}} = 0.25 \text{ mol L}^{-1}$ , solvent = 100 mL cyclohexane,  $m_{\text{cat}} = 1 \text{ g}$ ,  $w_{\text{Pd}} = 10 \text{ wt\%}$ , stirring speed =  $1000 \text{ min}^{-1}$ , ionic liquid coating = 13 wt%.

The LCC coated Pd-SCILL-2 catalyst was tested in the temperature range between 40 and 90 °C.

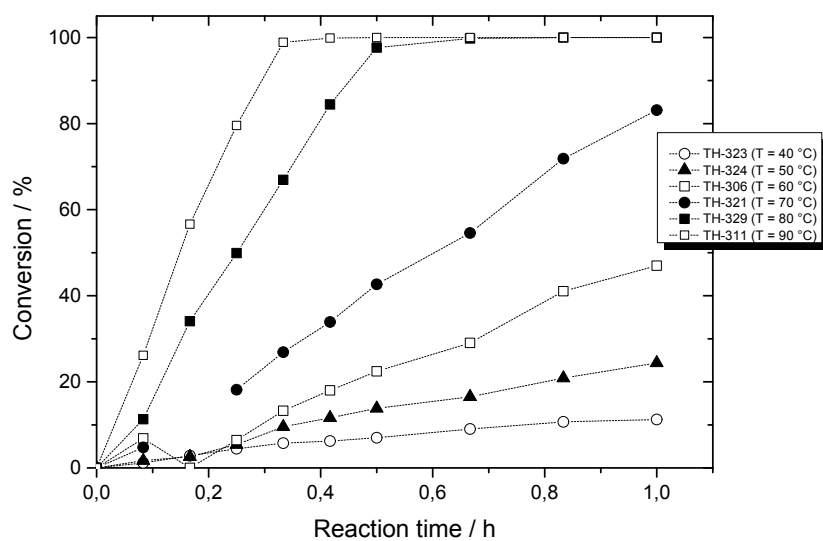

Figure S6. Conversion over time plot for the hydrogenation of toluene using Pd-SCILL-2 catalyst. Reaction conditions:  $p_{\text{hydrogen}} = 15 \text{ bar}$ ,  $c_{\text{toluene}} = 0.25 \text{ mol L}^{-1}$ , solvent = 100 mL cyclohexane,  $m_{\text{cat}} = 1 \text{ g}$ ,  $w_{\text{Pd}} = 10 \text{ wt\%}$ , stirring speed =  $1000 \text{ min}^{-1}$ , ionic liquid coating = 13 wt%.

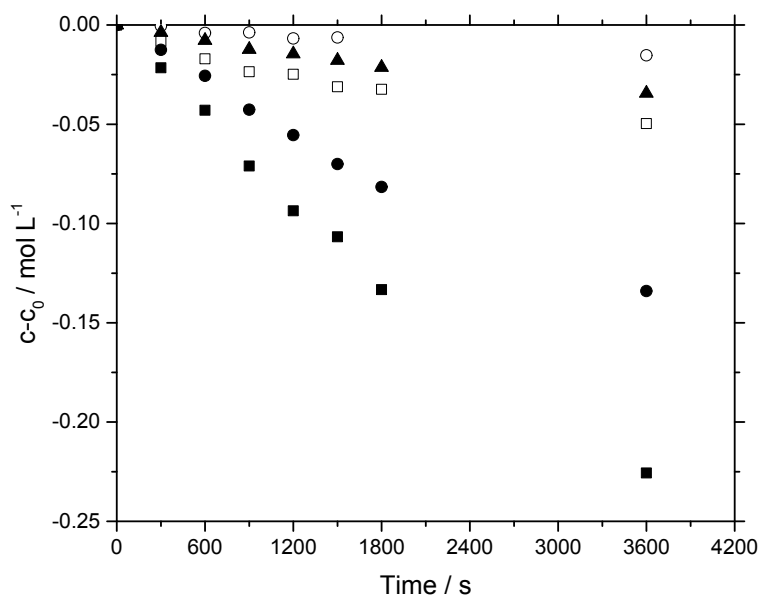

Figure S7. Integral analysis of toluene hydrogenation using Pd/C catalysts. Temperatures as indicated in Figure S3.

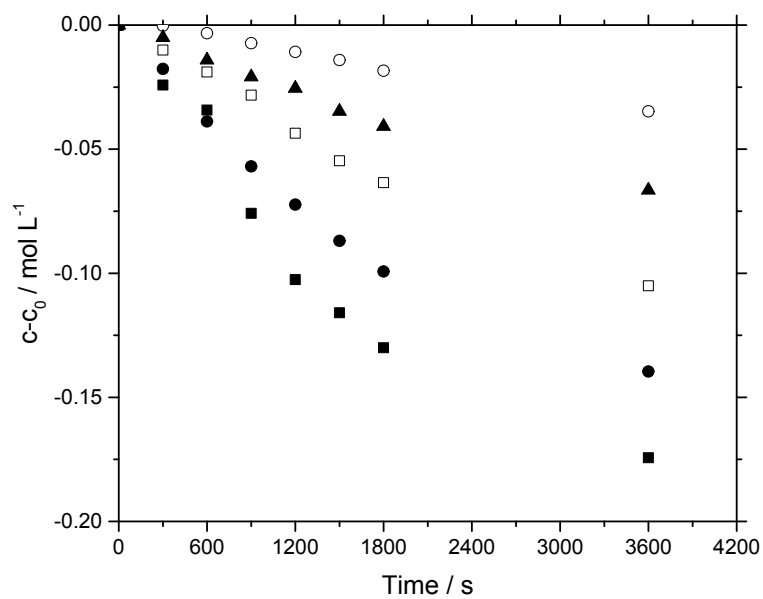

Figure S8. Integral analysis of toluene hydrogenation using Pd-SCILL-1 catalysts. Temperatures as indicated in Figure S4.

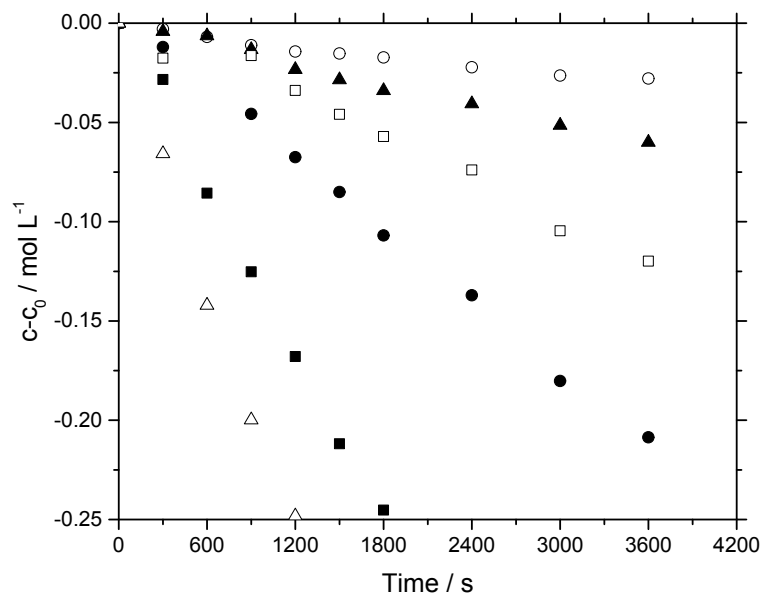

Figure S9. Integral analysis of toluene hydrogenation using Pd-SCILL-2 catalysts. Temperatures as indicated in Figure S5.

## Agitation speed variation

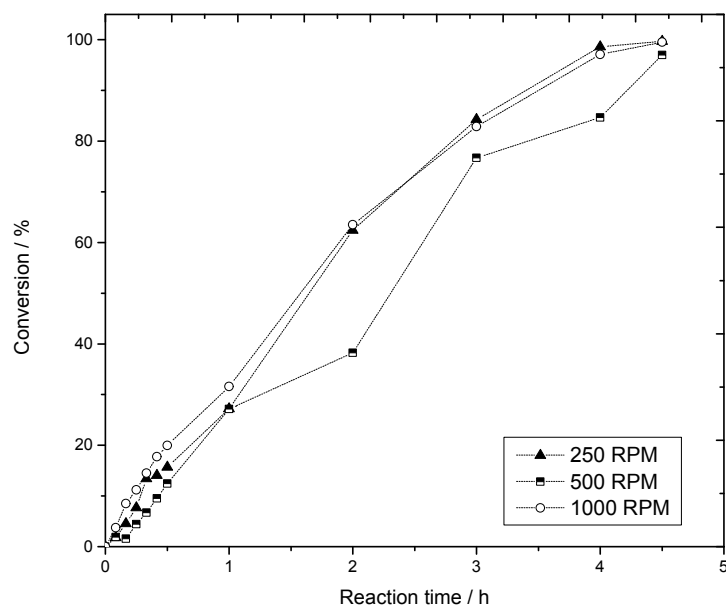

Figure S10. Conversion over time plot for the agitation speed variation of the hydrogenation of toluene using Pd/C catalyst. Reaction conditions:  $p_{\text{hydrogen}} = 15$  bar,  $c_{\text{toluene}} = 0.25$  mol L<sup>-1</sup>, solvent = 100 mL cyclohexane,  $m_{\text{cat}} = 1$  g,  $w_{\text{Pd}} = 10$  wt%, stirring speed = 250-1000 min<sup>-1</sup>.

## Metal leaching studies

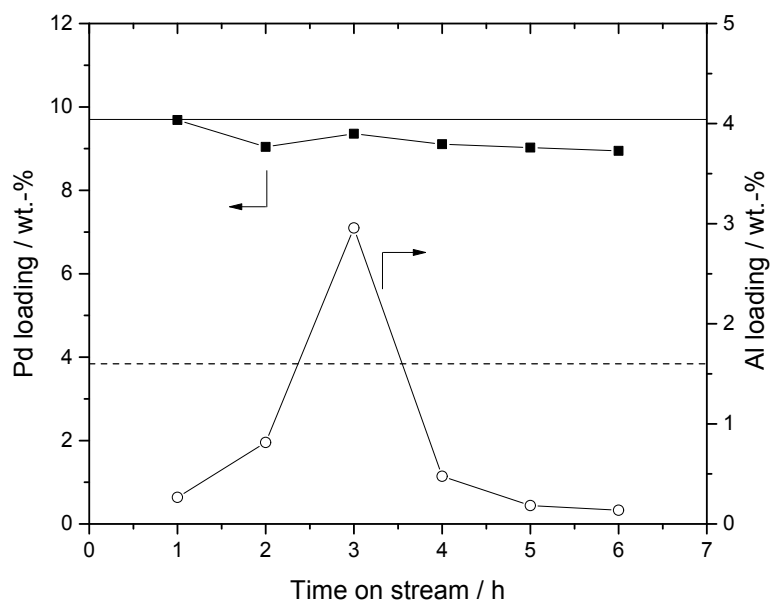

Figure S11. Leaching studies determined via ICP analysis of the Pd-SCILL samples. Reaction conditions:  $T = 60$  °C,  $p_{\text{hydrogen}} = 1$  bar,  $c_{\text{toluene}} = 0.25$  mol L<sup>-1</sup>, solvent = 100 mL cyclohexane,  $m_{\text{cat}} = 1$  g,  $w_{\text{Pd}} = 10$  wt%, stirring speed = 1000 min<sup>-1</sup>, ionic liquid coating = 13 wt%. The solid line indicates the initial Pd loading, the dashed line indicates the initial Al loading.
